# Supplementary material for: Who Bears the Burden of Long-Lived Molecular Biology Databases?
Source: bioRxiv or medRxiv preprint supplement (doi:10.1101/552067), 2019-02-21
Supplement: Supplementary file [file media-1.pdf]

# Supplemental Materials

S1. Individual funding organizations

S2. Individual databases

S3. Individual operating organizations

**Table S1.** Individual funding organizations identified as funding databases in *NAR Database Issue* articles. Organizational codes are A (academic), C (consortium/collective), G (government), I (industry), P (philanthropic), and S (society/association).

|    | FUNDER                                                               | ORG CODE | DB COUNT |    | FUNDER                                                        | ORG CODE | DB COUNT |
|----|----------------------------------------------------------------------|----------|----------|----|---------------------------------------------------------------|----------|----------|
| 1  | US National Institutes of Health                                     | G        | 29       | 45 | Polish Ministry of Science and Higher Education               | G        | 1        |
| 2  | European Commission                                                  | G        | 13       | 46 | Engineering and Physical Sciences Research Council            | G        | 1        |
| 3  | UK Biotechnology and Biological Sciences Research Council            | G        | 7        | 47 | Swiss Federal Office of Education and Science                 | G        | 1        |
| 4  | US Department of Energy                                              | G        | 7        | 48 | US Department of Agriculture                                  | G        | 1        |
| 5  | Ministry of Education Culture Sports Science and Technology of Japan | G        | 6        | 49 | Science Foundation Ireland                                    | G        | 1        |
| 6  | US National Science Foundation                                       | G        | 6        | 50 | German Federal Ministry of Education and Research             | G        | 1        |
| 7  | Japan Science and Technology Agency                                  | G        | 5        | 51 | Italian Ministry of Education Universities and Research       | G        | 1        |
| 8  | European Molecular Biology Laboratory                                | G        | 5        | 52 | Italian National Research Council                             | G        | 1        |
| 9  | Danish Ministry of Higher Education and Science                      | G        | 5        | 53 | Histogenetics                                                 | I        | 1        |
| 10 | UK Medical Research Council                                          | G        | 4        | 54 | One Lambda Inc                                                | I        | 1        |
| 11 | Wellcome Trust                                                       | P        | 3        | 55 | Conexio                                                       | I        | 1        |
| 12 | Kazusa DNA Research Institute Foundation                             | P        | 3        | 56 | Abbott Molecular Laboratories Inc                             | I        | 1        |
| 13 | University of Tokyo                                                  | A        | 2        | 57 | GenProbe                                                      | I        | 1        |
| 14 | Aarhus University                                                    | A        | 2        | 58 | LabCorp                                                       | I        | 1        |
| 15 | SWEGENE Consortium                                                   | C        | 2        | 59 | Life Technologies                                             | I        | 1        |
| 16 | Swiss National Science Foundation                                    | G        | 2        | 60 | Olersup SSP                                                   | I        | 1        |
| 17 | Agence Nationale de la Recherche                                     | G        | 2        | 61 | 454 Sequencing                                                | I        | 1        |
| 18 | Howard Hughes Medical Institute                                      | P        | 2        | 62 | BAG Healthcare                                                | I        | 1        |
| 19 | Adam Mickiewicz University                                           | A        | 1        | 63 | Innotrain Diagnostik GMBH                                     | I        | 1        |
| 20 | Kyoto University                                                     | A        | 1        | 64 | Lundbeck Foundation                                           | I        | 1        |
| 21 | Poitiers University Foundation                                       | A        | 1        | 65 | GlaxoSmithKline                                               | I        | 1        |
| 22 | University of Leicester                                              | A        | 1        | 66 | BioFocus                                                      | I        | 1        |
| 23 | Universite de Montpellier                                            | A        | 1        | 67 | New England Biolabs                                           | I        | 1        |
| 24 | Oxford University Press                                              | A        | 1        | 68 | Isis Pharmaceuticals                                          | I        | 1        |
| 25 | University of California Irving                                      | A        | 1        | 69 | Microsoft                                                     | I        | 1        |
| 26 | Johns Hopkins University                                             | A        | 1        | 70 | BioRegioN GmbH                                                | I        | 1        |
| 27 | University of Manchester                                             | A        | 1        | 71 | BIOBASE GmbH                                                  | I        | 1        |
| 28 | Universidad Nacional Autonoma de Mexico                              | A        | 1        | 72 | Anthony Nolan                                                 | P        | 1        |
| 29 | Cornell University                                                   | A        | 1        | 73 | Be the Match Foundation                                       | P        | 1        |
| 30 | Dutch Working Group of Tumor Cytogenetics                            | C        | 1        | 74 | Deutsche Knochenmarkspenderdatei                              | P        | 1        |
| 31 | Cancer Cytogenomics Microarray Consortium US                         | C        | 1        | 75 | Rose and Zentrum Knochenmarkspender Register Deutschland      | P        | 1        |
| 32 | National Centre for Research on Growth and Development               | C        | 1        | 76 | Imperial Cancer Research Fund                                 | P        | 1        |
| 33 | BioCampus Montpellier                                                | C        | 1        | 77 | Child Cancer Foundation                                       | P        | 1        |
| 34 | Grand Plateau Technique pour la Recherche                            | C        | 1        | 78 | Ellison Foundation                                            | P        | 1        |
| 35 | Ciber Enfermedades Raras                                             | C        | 1        | 79 | Sandler Family Supporting Foundation                          | P        | 1        |
| 36 | King Abdelaziz City for Science and Technology                       | G        | 1        | 80 | National Foundation for Cancer Research                       | P        | 1        |
| 37 | French Ministry of Higher Education and Scientific Research          | G        | 1        | 81 | Association des Cytogeneticiens de Langue Francaise           | S        | 1        |
| 38 | Czech Science Foundation                                             | G        | 1        | 82 | Belgian Society of Human Genetics                             | S        | 1        |
| 39 | Polish National Science Centre                                       | G        | 1        | 83 | French National League against Cancer                         | S        | 1        |
| 40 | Health Research Council of New Zealand                               | G        | 1        | 84 | Berufsverband Deutscher Humangenetiker                        | S        | 1        |
| 41 | Centre National de la Recherche Scientifique                         | G        | 1        | 85 | European Federation for Immunogenetics                        | S        | 1        |
| 42 | Ministere de l Enseignement Superieur et de la Recherche             | G        | 1        | 86 | American Society for Histocompatibility and Immunogenetics    | S        | 1        |
| 43 | Spanish Ministry of Economy Industry and Competitiveness             | G        | 1        | 87 | AsiaPacific Histocompatibility and Immunogenetics Association | S        | 1        |
| 44 | Diputacion General de Aragon                                         | G        | 1        | 88 | Fonds der Chemischen Industrie eV                             | S        | 1        |
|    |                                                                      |          |          | 89 | Royal Society                                                 | S        | 1        |

**Table S2.** Funding organizations identified for individual databases. Organizational codes are A (academic), C (consortium/collective), G (government), I (industry), P (philanthropic), and S (society/association). Database identifiers (DB ID) are as reported in (Imker, 2018).

|    | DB ID    | NAME                                               | NAR DEBUT YEAR | ALL FUNDER ORG CODES | CONDENSED ORG CODES |
|----|----------|----------------------------------------------------|----------------|----------------------|---------------------|
| 1  | MBDC0001 | DDBJ: DNA Data Bank of Japan                       | 1997           | GG                   | G                   |
| 2  | MBDC0002 | EMBL-EBI ENA: European Nucleotide Archive          | 1991           | GGG                  | G                   |
| 3  | MBDC0003 | NCBI Genbank                                       | 1991           | G                    | G                   |
| 4  | MBDC0007 | NCBI COG: Clusters of Orthologous Groups           | 2000           | G                    | G                   |
| 5  | MBDC0015 | GXD: mouse Gene Expression Database                | 1999           | GG                   | G                   |
| 6  | MBDC0021 | RECODE                                             | 2001           | GG                   | G                   |
| 7  | MBDC0030 | CUTG: Codon Usage Tabulated from GenBank           | 1991           | GP                   | GP                  |
| 8  | MBDC0031 | DBTBS: Database of Transcription in B. subtilis    | 2001           | AGG                  | AG                  |
| 9  | MBDC0033 | EPD: Eukaryotic Promoter Database                  | 1998           | G                    | G                   |
| 10 | MBDC0043 | rrnDB                                              | 2001           | GGG                  | G                   |
| 11 | MBDC0051 | WormBase                                           | 2001           | GGGP                 | GP                  |
| 12 | MBDC0068 | CyanoBase                                          | 1998           | GGP                  | GP                  |
| 13 | MBDC0069 | EcoGene                                            | 2000           | G                    | G                   |
| 14 | MBDC0071 | FlyBase                                            | 1994           | GG                   | G                   |
| 15 | MBDC0072 | DB-AT: Database of Apicomplexan Transcriptomes     | 2001           | GG                   | G                   |
| 16 | MBDC0075 | JGI GOLD: Genomes OnLine Database                  | 2001           | G                    | G                   |
| 17 | MBDC0084 | MITOMAP                                            | 1996           | ACGGGGP              | ACGP                |
| 18 | MBDC0087 | MGD: Mouse Genome Database                         | 1997           | G                    | G                   |
| 19 | MBDC0091 | PlasmoDB                                           | 2001           | G                    | G                   |
| 20 | MBDC0097 | TAIR: The Arabidopsis Information Resource         | 2001           | AGGI                 | AGI                 |
| 21 | MBDC0101 | ZFIN: Zebrafish Information Network                | 2001           | G                    | G                   |
| 22 | MBDC0108 | EcoCyc                                             | 1996           | G                    | G                   |
| 23 | MBDC0112 | KEGG: Kyoto Encyclopedia of Genes and ...          | 1999           | G                    | G                   |
| 24 | MBDC0116 | RegulonDB                                          | 1998           | AG                   | AG                  |
| 25 | MBDC0119 | ALFRED: Allele Frequency Database                  | 2000           | G                    | G                   |
| 26 | MBDC0122 | Atlas of Genetics and Cytogenetics in Oncology ... | 1999           | ACCGGSSSS            | ACGS                |
| 27 | MBDC0131 | GWAS Central                                       | 2000           | AGI                  | AGI                 |
| 28 | MBDC0143 | OMIM: Online Mendelian Inheritance in Man          | 1994           | AG                   | AG                  |
| 29 | MBDC0152 | MTB: Mouse Tumor Biology Database                  | 1999           | G                    | G                   |
| 30 | MBDC0162 | ESTHER: ESTerases, alpha-beta Hydrolase ...        | 1996           | G                    | G                   |
| 31 | MBDC0166 | GPCRDB: G Protein-Coupled Receptor Database        | 1998           | GGGI                 | GI                  |
| 32 | MBDC0171 | HUGE                                               | 1999           | P                    | P                   |
| 33 | MBDC0172 | IMGT: ImMunoGeneTics database                      | 1997           | ACCGGGG              | ACG                 |
| 34 | MBDC0173 | EMBL-EBI IPD IMGT/HLA                              | 2001           | GIIIIIIIIIPPPPPSSS   | GIPS                |
| 35 | MBDC0177 | MEROPS                                             | 1999           | P                    | P                   |
| 36 | MBDC0194 | PIR: Protein Identification Resouce                | 1991           | G                    | G                   |
| 37 | MBDC0195 | Ribonuclease P Database                            | 1994           | GI                   | GI                  |
| 38 | MBDC0199 | TIGRFAMs                                           | 2001           | G                    | G                   |
| 39 | MBDC0207 | EMBL-EBI InterPro                                  | 2001           | GG                   | G                   |
| 40 | MBDC0210 | Pfam                                               | 1998           | GGPP                 | GP                  |
| 41 | MBDC0212 | PRINTS                                             | 1994           | AGGGGIS              | AGIS                |
| 42 | MBDC0215 | PROSITE                                            | 1991           | GG                   | G                   |
| 43 | MBDC0218 | SMART: Simple Modular Architecture Resea...        | 1999           | G                    | G                   |
| 44 | MBDC0221 | AAIndex: Amino Acid Index Database                 | 1999           | AAGG                 | AG                  |
| 45 | MBDC0224 | REBASE: Restriction Enzymes and methylases ...     | 1991           | I                    | I                   |
| 46 | MBDC0230 | 5S rRNA Data Bank (Erdmann)                        | 1991           | A                    | A                   |
| 47 | MBDC0232 | ARED: Adenylate uridylylate-Rich Elements ...      | 2001           | G                    | G                   |
| 48 | MBDC0243 | RDP: Ribosomal Database Project                    | 1991           | GGGG                 | G                   |
| 49 | MBDC0248 | SRPDB: Signal Recognition Particle Database        | 1992           | ACGGG                | ACG                 |
| 50 | MBDC0250 | tmRDB: tmRNA database                              | 1998           | ACGGG                | ACG                 |
| 51 | MBDC0252 | UTRdb: UnTranslated Regions of eukaryotic mR ...   | 1998           | GG                   | G                   |
| 52 | MBDC0258 | CATH: Class, Architecture, Topology, Homology      | 1999           | GGP                  | GP                  |
| 53 | MBDC0270 | NCBI MMDB: Molecular Modeling DataBase             | 1999           | G                    | G                   |
| 54 | MBDC0276 | RCSB PDB: Protein Data Bank                        | 2000           | GGG                  | G                   |
| 55 | MBDC0278 | EMBL-EBI PDBsum                                    | 2001           | GGGGG                | G                   |
| 56 | MBDC0282 | SCOP: Structural Classification of Proteins        | 1997           | GG                   | G                   |
| 57 | MBDC0294 | IGC: Imprinted Gene Catalogue                      | 2001           | CGP                  | CGP                 |
| 58 | MBDC0331 | MODBASE                                            | 2000           | GGGP                 | GP                  |
| 59 | MBDC0340 | TRANSFAC                                           | 1996           | GGII                 | GI                  |
| 60 | MBDC0357 | SGD: Saccharomyces Genome Database                 | 1998           | G                    | G                   |
| 61 | MBDC0381 | ncRNAdb: Noncoding RNAs database                   | 1999           | GPS                  | GPS                 |
| 62 | NAR9161  | MBDC: Molecular Biology Database Collection        | 1999           | AG                   | AG                  |
| 63 | NAR9294  | tmRNA Website                                      | 1998           | G                    | G                   |

**Table S3.** Individual operating organizations identified. Organizational codes are A (academic), C (consortium/collective), G (government), I (industry), P (philanthropic), and S (society/association).

|    | <b>HOST</b>                                                  | <b>ORG CODE</b> | <b>DB COUNT</b> | <b>TOTAL DB COUNT / OPER ORG CODE</b> |
|----|--------------------------------------------------------------|-----------------|-----------------|---------------------------------------|
| 1  | European Molecular Biology Laboratory                        | G               | 8               | 10                                    |
| 2  | Swiss Institute of Bioinformatics                            | G               | 4               | 10                                    |
| 3  | US National Institutes of Health                             | G               | 4               | 10                                    |
| 4  | Kazusa DNA Research Institute                                | P               | 3               | 5                                     |
| 5  | Jackson Laboratory                                           | P               | 3               | 5                                     |
| 6  | Kyoto University                                             | A               | 2               | 28                                    |
| 7  | University of Tokyo                                          | A               | 2               | 28                                    |
| 8  | Center for NonCoding RNA in Technology and Health            | C               | 2               | 4                                     |
| 9  | Adam Mickiewicz University                                   | A               | 1               | 28                                    |
| 10 | Yale University                                              | A               | 1               | 28                                    |
| 11 | University College London                                    | A               | 1               | 28                                    |
| 12 | University of Miami                                          | A               | 1               | 28                                    |
| 13 | University of Copenhagen                                     | A               | 1               | 28                                    |
| 14 | University of Leicester                                      | A               | 1               | 28                                    |
| 15 | University of Otago                                          | A               | 1               | 28                                    |
| 16 | Universite de Montpellier                                    | A               | 1               | 28                                    |
| 17 | Oxford University Press                                      | A               | 1               | 28                                    |
| 18 | University of California Irving                              | A               | 1               | 28                                    |
| 19 | University of California San Francisco                       | A               | 1               | 28                                    |
| 20 | Johns Hopkins University                                     | A               | 1               | 28                                    |
| 21 | University of Delaware                                       | A               | 1               | 28                                    |
| 22 | Georgetown University Medical Center                         | A               | 1               | 28                                    |
| 23 | University of Manchester                                     | A               | 1               | 28                                    |
| 24 | Rutgers University                                           | A               | 1               | 28                                    |
| 25 | The State University of New Jersey                           | A               | 1               | 28                                    |
| 26 | University of California San Diego                           | A               | 1               | 28                                    |
| 27 | Michigan State University                                    | A               | 1               | 28                                    |
| 28 | University College Cork                                      | A               | 1               | 28                                    |
| 29 | National Autonomous University of Mexico                     | A               | 1               | 28                                    |
| 30 | North Carolina State University                              | A               | 1               | 28                                    |
| 31 | University of Michigan                                       | A               | 1               | 28                                    |
| 32 | Stanford University                                          | A               | 1               | 28                                    |
| 33 | University of Bari                                           | A               | 1               | 28                                    |
| 34 | University of Oregon                                         | A               | 1               | 28                                    |
| 35 | King Faisal Specialist Hospital and Research Center          | G               | 1               | 10                                    |
| 36 | Institute of Scientific and Technical Information            | G               | 1               | 10                                    |
| 37 | DDJB Center                                                  | G               | 1               | 10                                    |
| 38 | French National Institute for Agricultural Research          | G               | 1               | 10                                    |
| 39 | DOE Joint Genome Institute                                   | G               | 1               | 10                                    |
| 40 | MRC Laboratory of Molecular Biology                          | G               | 1               | 10                                    |
| 41 | Sandia National Laboratories                                 | G               | 1               | 10                                    |
| 42 | SRI International                                            | P               | 1               | 5                                     |
| 43 | Phoenix Bioinformatics Corporation                           | P               | 1               | 5                                     |
| 44 | J Craig Venter Institute                                     | P               | 1               | 5                                     |
| 45 | FLyBase Consortium                                           | C               | 1               | 4                                     |
| 46 | EuPathDB Consortium                                          | C               | 1               | 4                                     |
| 47 | Wormbase Consortium                                          | C               | 1               | 4                                     |
| 48 | New England Biolabs                                          | I               | 1               | 2                                     |
| 49 | GeneXplain                                                   | I               | 1               | 2                                     |
| 50 | Institute of Bioorganic Chemistry Polish Academy of Sciences | S               | 1               | 1                                     |
